# Supplementary material for: Supramolecular architectures based on binuclear Pt(ii) complexes consisting of different ligands and circular and helical fiber structures
Source: Royal Society of Chemistry journal article supplement (doi:10.1039/d2qi02130g), 2022-12-01
Supplement: d2qi02130g1.pdf [file d2qi02130g1.pdf]

## Electronic Supplementary Information

Supramolecular architectures based on binuclear  
Pt(II) complexes consisting different ligands;  
circular and helical fiber structures

Minhye Kim,<sup>a</sup> Mirae Ok,<sup>a</sup> Chenxing Li,<sup>a</sup> Kayeong Go,<sup>a</sup> Sehee Kim,<sup>a</sup> Juyeong Kim,<sup>a</sup> Jong Hwa  
Jung\*<sup>a</sup> and Sung Ho Jung\*<sup>a</sup>

*Department of Chemistry and Research Institute of Natural Sciences Gyeongsang National University,  
Jinju 52828, Korea*

## **Contents**

### **1. Method**

|                                                  |    |
|--------------------------------------------------|----|
| 1.1 General characterization .....               | S3 |
| 1.2 UV-vis studies studies .....                 | S3 |
| 1.3 Preparation of platinum complexes .....      | S3 |
| 1.4 AFM observation .....                        | S3 |
| 1.5 SEM observation .....                        | S3 |
| 1.6 Calculation of thermodynamic parameter ..... | S4 |
| 1.7 Theoretical calculations .....               | S4 |

### **2. Synthesis and characterization**

|                                                |    |
|------------------------------------------------|----|
| 2.1 Synthesis of <i>R-L</i> <sup>2</sup> ..... | S4 |
| 2.2 Synthesis of <i>R-L</i> <sup>1</sup> ..... | S4 |
| 2.3 Synthesis of <b>Ch-1</b> .....             | S5 |
| 2.4 Synthesis of <b>Ph-1</b> .....             | S5 |
| 2.5 Synthesis of <b>Py-1</b> .....             | S6 |

### **3. Supplementary scheme and figures**

|                          |     |
|--------------------------|-----|
| 3.1 Scheme S1 .....      | S6  |
| 3.2 Figures S1-S26 ..... | S6  |
| 3.3 Tables S1-S2 .....   | S17 |

### **4. Analytical data**

|                                                           |     |
|-----------------------------------------------------------|-----|
| 4.1 <sup>1</sup> H- and <sup>13</sup> C-NMR spectra ..... | S18 |
| 4.2 ESI mass spectra .....                                | S21 |

## Supplementary data

### 1. Methods

**1.1 General characterization:** The  $^1\text{H}$  and  $^{13}\text{C}$  NMR spectra were taken on a Bruker DRX 300, and Bruker DRX 500. Mass spectroscopy samples were analyzed on a JEOL JMS-700 mass spectrometer. The high resolution mass spectra (HR-MS) were measured by electrospray ionization (ESI) with a micro TOF Focus spectrometer from SYNAPT G2 (Waters, U.K.). A UV-visible spectrophotometer (JASCO V-750) was used to obtain the absorption spectra. IR spectra were observed over the range  $500\text{-}4000\text{ cm}^{-1}$ , with a Thermo scientific Nicolet iS 10 instrument. Florescence lifetimes of **Ch-1** and **Ph-1** were measured at room temperature by C11367-11. Powder X-ray pattern (PXRD) was recorded on a Rigaku model NANOPIX X-ray diffractometer with a  $\text{Cu K}_\alpha$  radiation source.

**1.2 UV-vis studies:** The UV-vis spectra were recorded on a JASCO V-750 UV-visible spectrophotometer. The UV-vis spectra were determined over the range of  $200\text{-}700\text{ nm}$  using a quartz cell with  $0.1\text{ mm}$  and  $1\text{ mm}$  path length. Scans were taken at rate of  $500\text{ nm/min}$  with a sampling interval of  $0.5\text{ nm}$  and response time of  $0.5\text{ s}$ . To elucidate the supramolecular polymerization process, **Ch-1** ( $9\text{ mM}$ ) with or without pyridine, and **Ph-1** ( $9\text{ mM}$ ) were dissolved in  $\text{H}_2\text{O/DMSO}$  ( $1:9\text{ v/v}$ ). After adding the sample to the UV cells, it was heated to  $363\text{ K}$  ( $1\text{ }^\circ\text{C/min}$ ) to form the monomeric species in UV-vis spectroscopy. Then the sample was cooled to  $293\text{ K}$  ( $1\text{ }^\circ\text{C/min}$ ) in UV-vis spectroscopy. The time-dependent UV-vis spectral changes were measured at  $293\text{ K}$ .

**1.3 AFM observation:** Atomic force microscope (AFM) imaging was performed by using XE-100 and a PPP-NCHR  $10\text{ M}$  cantilever (Park systems). The AFM samples were prepared by spin-coating ( $2000\text{ rpm}$ ) onto freshly cleaved Muscovite Mica, and images were recorded with the AFM operating in noncontact mode in air at RT with resolution of  $1024 \times 1024$  pixels, using moderate scan rates ( $0.3\text{ Hz}$ ).

**1.4 SEM observation:** FE-SEM images were observed using a JEOL (JSM-7900F). The images of samples using an accelerating voltage  $10\text{ kV}$  and an emission current of  $8\mu\text{A}$ . Samples were prepared by dropping dilute solution of supramolecular nanostructure formed in water on glasses following by spinning, drying and coating them with a thin layer of Pt to increase the contrast.

**1.5 Calculation of thermodynamic parameter:** The thermodynamic parameters governing

the supramolecular aggregation of **Ch-1** and **Ph-1** were obtained by the global fitting of the melting curves. This global fitting is performed by using the equilibrium (EQ) model reported by ten Eikelder and coworkers.<sup>1</sup> The values for the elongation enthalpy ( $\Delta H_e$ ) and the entropy ( $\Delta S_e$ ), and elongation binding constant ( $K_e$ ) used in the cooperative supramolecular polymerization models were determined by the global fitting of the heating curves,<sup>2-4</sup> which were obtained by plotting the degree of aggregation ( $\alpha_{agg}$ ) of **Ch-1** (9 mM) without or with pyridine (140 equiv.) and **Ph-1** (9 mM) at 331 nm against temperature with heating experiments. An elongation binding constant ( $K_e$ ) for aggregation at 293 K was estimated according to equation 1, from which the enthalpy change ( $\Delta H$ ), and the entropy change ( $\Delta S$ ) were determined:

$$K_e = e^{-\frac{(\Delta H_e - T\Delta S_e)}{RT}} \quad (\text{equation 1})$$

## 2. Synthesis and characterization

**2.1 Synthesis of *R-L*<sup>2</sup>:** (*R*)-(-)-2-amino-1-propanol (0.28 g, 3.7 mmol) was added to a stirred suspension of powdered KOH (1.05 g, 18.7 mmol) in dry DMSO (20 mL) at 60 °C. After 30 min, 4'-chloro-2,2':6',2''-terpyridine (1.00 g, 3.7 mmol) was added to the mixture. The mixture was then stirred for 4 h at 70 °C and poured into 600 mL of distilled water thereafter. CH<sub>2</sub>Cl<sub>2</sub> (3 × 200 mL) was used to extract the aqueous phase. Residual water in dichloromethane was dried over Na<sub>2</sub>SO<sub>4</sub> and CH<sub>2</sub>Cl<sub>2</sub> was removed in vacuum, and the desired product was purified by recrystallization with ethyl acetate to give 0.72 g (72%) of *R-L*<sup>2</sup>. Mp = 118.3 °C; IR (KBr pellet): 3375, 2964, 2926, 2846, 1577, 1565, 1473, 1439, 1403, 1353, 1204, 799 cm<sup>-1</sup>; <sup>1</sup>H NMR (300 MHz, CDCl<sub>3</sub>): δ 8.70 (m, *J* = 4.8, 1.8, 0.9 Hz, 2H), 8.62 (m, *J* = 8.0, 1.1 Hz, 2H), 8.02 (s, 2H), 7.84 (m, *J* = 7.7, 1.8 Hz, 2H), 7.33 (m, *J* = 7.4, 4.8, 1.2 Hz, 2H), 4.14 (m, *J* = 9.0, 4.1 Hz, 1H), 3.94 (m, *J* = 9.1, 7.6 Hz, 1H), 3.41 (m, *J* = 10.6, 7.6, 6.6, 4.2 Hz, 1H), 1.21 (d, *J* = 6.5 Hz, 3H); <sup>13</sup>C NMR (125 MHz, DMSO-*d*<sub>6</sub>): δ 167.2, 157.1, 155.3, 149.7, 137.9, 125.0, 121.3, 107.3, 75.1, 46.2, 20.43; HR-Mass (*m/z*) calculated for C<sub>18</sub>H<sub>18</sub>N<sub>4</sub>O [M]<sup>+</sup>: 306.3690, Found [M]<sup>+</sup>: 306.3690.

**2.2 Synthesis of *R-L*<sup>1</sup>:** *R-L*<sup>1</sup> was prepared according to a literature procedure. In a two neck flask, *R-L*<sup>2</sup> (0.50 g, 1.64 mmol) and TEA (0.1 mL, 0.72 mmol) were added to dry CH<sub>2</sub>Cl<sub>2</sub> (10 mL). After cooling the solution in an ice bath, sebacyl chloride (0.16 mL, 0.75 mmol) was

added dropwise. The reactant was stirred for 3 h at room temperature. The crude product was recrystallized from CH<sub>2</sub>Cl<sub>2</sub> to give a white crystalline solid **R-L<sup>1</sup>** in 49.7% yield (0.632 g). Mp = 198 °C; IR (KBr pellet): 3428, 3311, 2929, 2845, 1640, 1582, 1563, 1466, 1446, 1407, 1362, 1207, 1038, 785 cm<sup>-1</sup>; <sup>1</sup>H NMR (300 MHz, DMSO-*d*<sub>6</sub>): δ 8.68 (m, 8H), 7.99 (m, 8H), 7.87 (d, *J* = 7.5 Hz, 2H), 7.50 (m, *J* = 7.7, 4.8, 1.6 Hz, 4H), 4.15 (m, 6H), 2.02 (t, *J* = 7.3 Hz, 4H), 1.42 (d, *J* = 7.5 Hz, 4H), 1.21 (s, 3H), 1.19 (s, 3H), 1.13 (s, 8H); <sup>13</sup>C NMR (125 MHz, DMSO-*d*<sub>6</sub>): δ 172.3, 167.1, 157.2, 155.3, 149.7, 137.8, 125.0, 121.3, 107.2, 70.9, 44.1, 35.9, 29.2, 29.0, 25.7, 17.6; HR-Mass (m/z) calculated for C<sub>46</sub>H<sub>50</sub>N<sub>8</sub>O<sub>4</sub> [M]<sup>+</sup>: 778.3955, Found [M]<sup>+</sup>: 778.3954.

**2.3 Synthesis of Ch-1:** In a two neck flask, reflux **R-L<sup>1</sup>** (0.3 g, 0.385 mmol) in MeOH (10 mL) at 80 °C. After **R-L<sup>1</sup>** is completely dissolved, Dichloro(1,5-cyclooctadiene)platinum(II) (0.14 g, 0.385 mmol) is added and converted into a yellow solution. Solvents were removed using rotary evaporator. The crude product was purified via column chromatography (Al<sub>2</sub>O<sub>3</sub> using Methanol 5: Dichloromethane 100). Then, the organic solvent was removed using a rotary evaporator and dried under vacuum. Yield: 42.8% (0.21 g); IR (KBr pellet): 3372, 3241, 2929, 2853, 1643, 1607, 1554, 1479, 1360, 1219, 1074, 1000, 704 cm<sup>-1</sup>; <sup>1</sup>H NMR (500 MHz, DMSO-*d*<sub>6</sub>) δ 8.42 (d, *J* = 7.6 Hz, 3H), 8.31 (m, *J* = 7.8, 1.5 Hz, 2H), 8.19 (d, *J* = 5.4 Hz, 2H), 7.96 (s, 2H), 7.76 – 7.67 (m, 2H), 4.22 (m, *J* = 12.7, 7.3 Hz, 2H), 4.17 – 4.09 (m, 0H), 4.11 (s, 1H), 2.20 (m, *J* = 32.6, 14.2, 7.1 Hz, 2H), 1.59 (s, 3H), 1.35 – 1.27 (m, 5H), 1.26 (d, *J* = 6.0 Hz, 3H), 0.88 (q, *J* = 7.0, 6.6 Hz, 1H); ESI-MASS (m/z) calculated for C<sub>46</sub>H<sub>50</sub>C<sub>12</sub>N<sub>8</sub>O<sub>4</sub>Pt<sub>2</sub> [M]<sup>2+</sup>: 619.1314, Found [M]<sup>2+</sup>: 619.5035.

**2.3 Synthesis of Ph-1:** **Ch-1** (0.5 g, 0.382 mmol) and phenylacetylene (0.55 g, 5.34 mmol) were dissolved in distilled dichloromethane (20 mL). And diisopropylamine (0.5 mL) was added to the mixed solution. Degas the mixture by N<sub>2</sub> bubbling with sonication. Added a catalytic amount of copper iodide (20 mg) to the mixture. Stirred the mixture in the dark for 10 hours. A lot of water was added the reaction mixture. The product was collected by filtration and dried under vacuum to give **Ph-1** as dark brown solid in 69.9% yield (0.375 g); IR (KBr pellet): 3356, 3233, 1642, 1607, 1426, 1217, 1031, 783 cm<sup>-1</sup>; <sup>1</sup>H NMR (500 MHz, DMSO-*d*<sub>6</sub>) δ 9.04 (d, *J* = 5.6 Hz, 4H), 8.58 (d, *J* = 7.9 Hz, 4H), 8.41 (t, *J* = 7.9 Hz, 4H), 8.21 (s, 4H), 7.94 (d, *J* = 6.6 Hz, 2H), 7.84 (t, *J* = 6.8 Hz, 4H), 7.45 (d, *J* = 7.5 Hz, 4H), 7.37 (t, *J* = 7.5 Hz, 4H), 7.30 (t, *J* = 7.4 Hz, 2H); ESI-MASS (m/z) calculated for C<sub>62</sub>H<sub>60</sub>N<sub>8</sub>O<sub>4</sub>Pt<sub>2</sub> [M]<sup>2+</sup>: 685.2017, Found [M]<sup>2+</sup>: 685.4167.

**2.3 Synthesis of Py-1:** Pyridine (30~420 equiv.) was added to **Ch-1** solution (9 mM) in DMSO/H<sub>2</sub>O. The mixed solution was maintained at 278 K for several days. The ligand exchange reaction by pyridine was monitored in **Ch-1** solution by ESI-MS.; ESI-MASS (m/z) calculated for C<sub>56</sub>H<sub>60</sub>N<sub>10</sub>O<sub>4</sub>Pt<sub>2</sub> [M]<sup>4+</sup>: 331.6024, Found [M]<sup>4+</sup>: 331.4167.

### 3. Supplementary scheme and figures

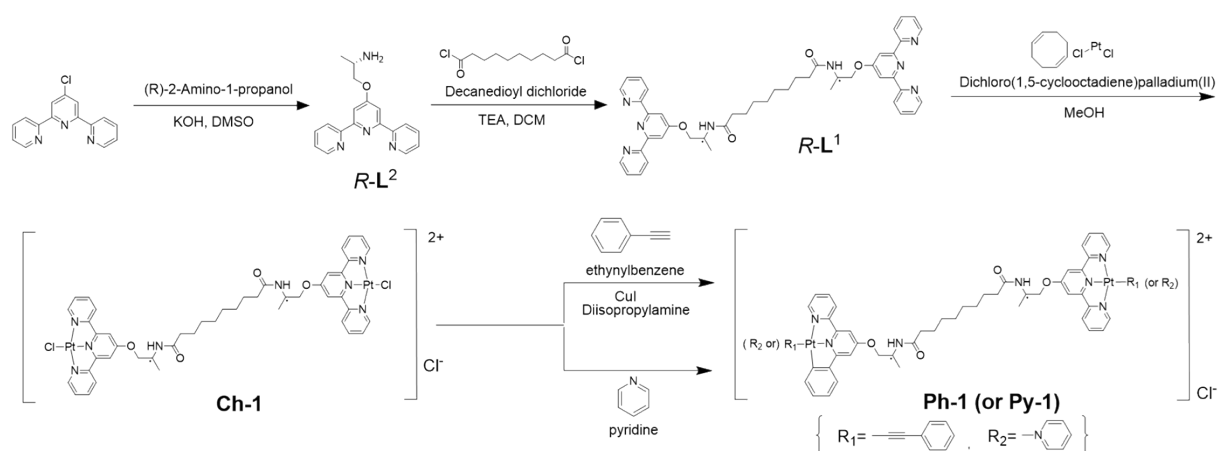

**Scheme S1.** Synthetic routes of **Ch-1**, **Ph-1** and **Py-1**.

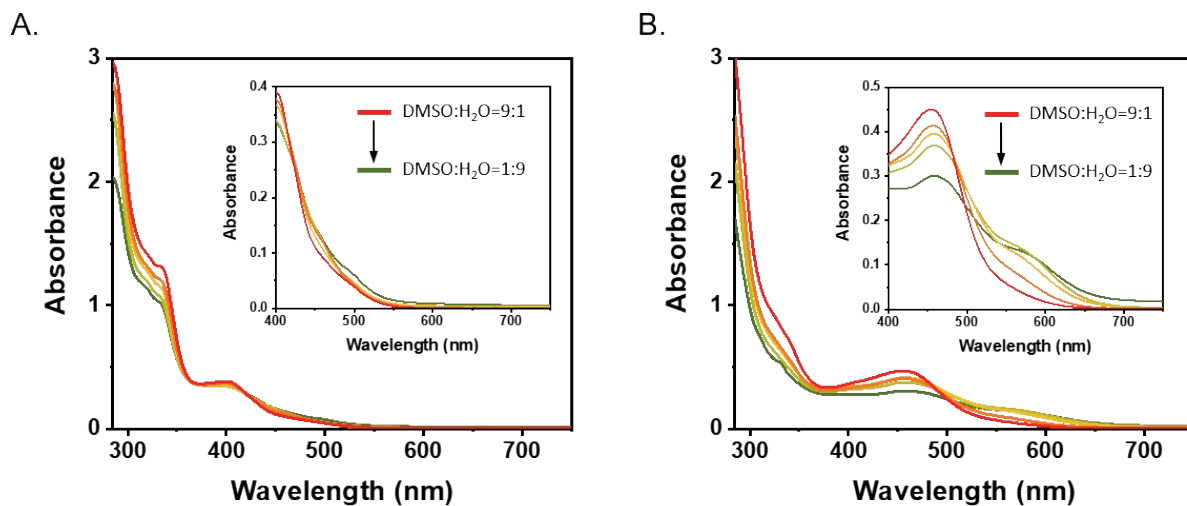

**Fig. S1** UV-vis spectra of (A) **Ch-1** (9 mM) and (B) **Ph-1** (6 mM) at different composition ratios of DMSO and H<sub>2</sub>O at 298 K.

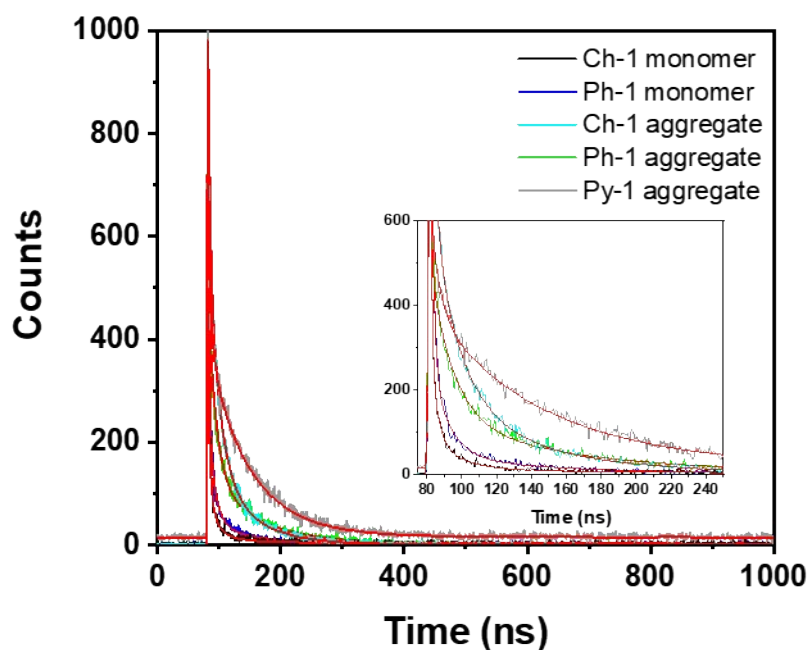

**Fig. S2** Emission decay curves of **Ch-1**, **Ph-1** and **Py-1** (9 mM) in DMSO and DMSO/H<sub>2</sub>O. All measurements were carried out at room temperature.

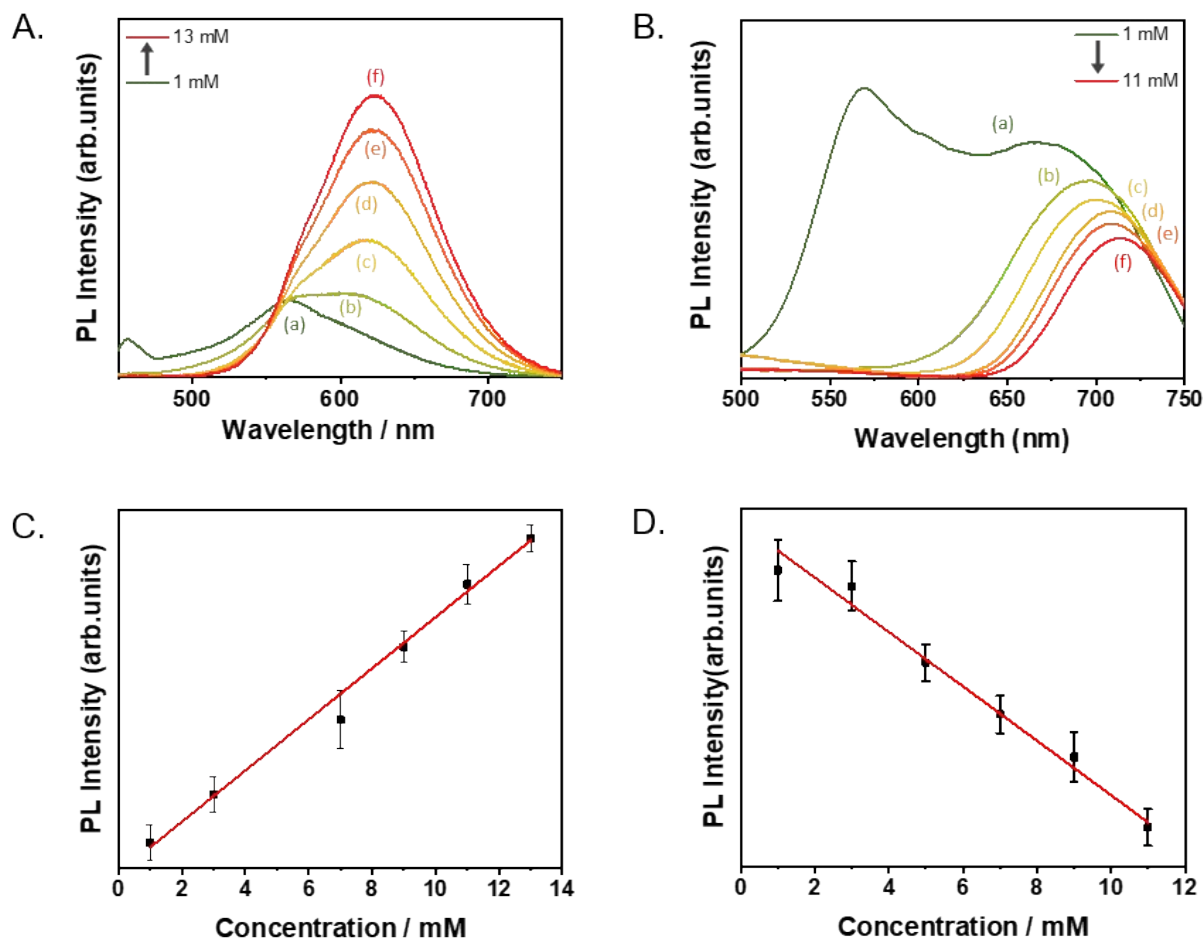

**Fig. S3** Concentration-dependent PL spectra of (A) **Ch-1** and (B) **Ph-1**; (a) 1 mM, (b) 3 mM, (c) 7 mM, (d) 9 mM, (e) 11 mM and (f) 13 mM in DMSO and H<sub>2</sub>O (1:9 v/v). (C and D) Plots of PL intensities vs. concentrations of **Ch-1** and **Ph-1** at 622.5 and 698.5 nm, respectively.



A.

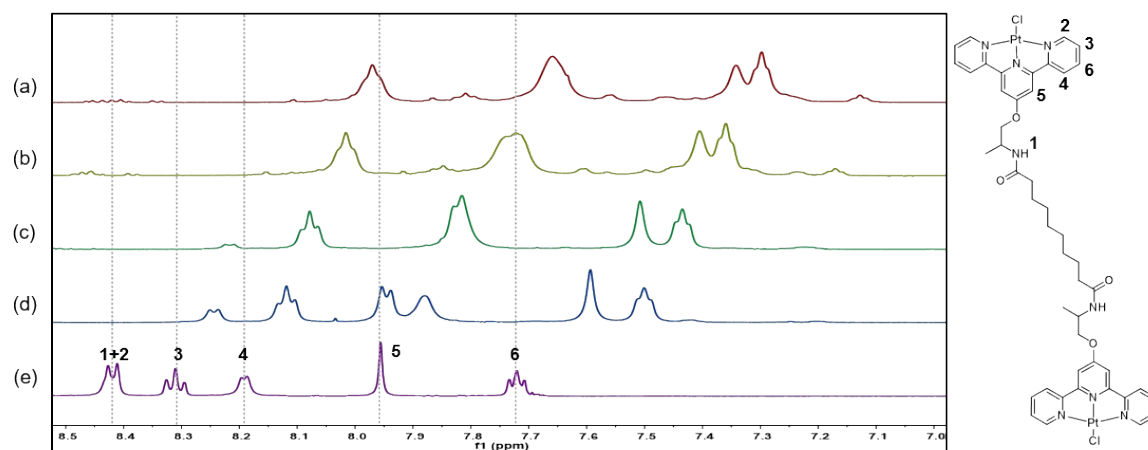

B.

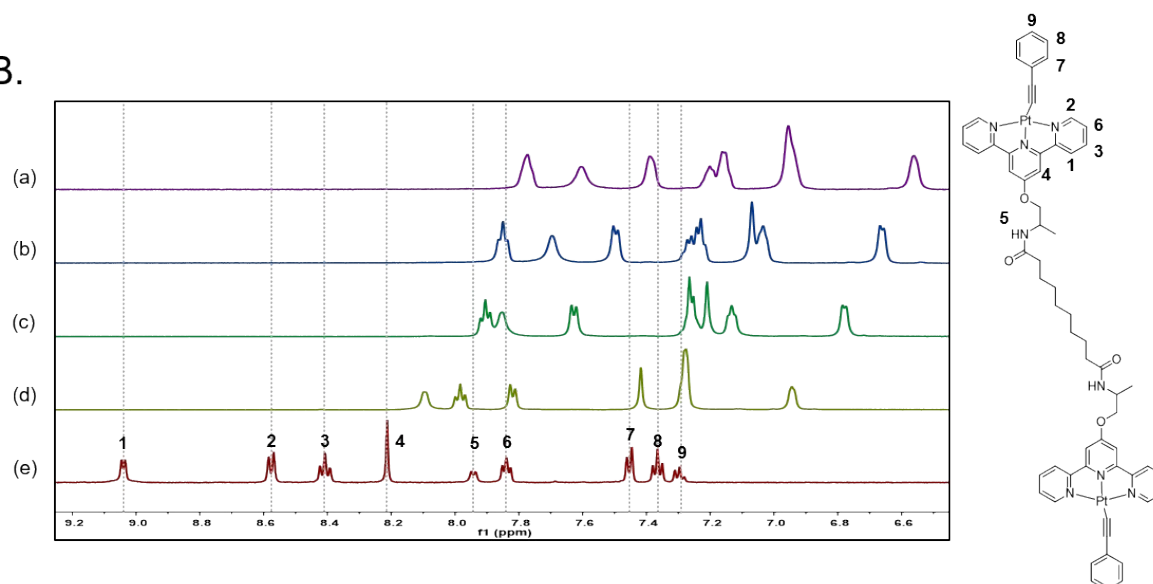

**Fig. S4**  $^1\text{H}$  NMR spectra of (A) **Ch-1** and (B) **Ph-1** by a mixed DMSO- $d_6$  and  $\text{D}_2\text{O}$  (a)1:9, (b)=3:7, (c)=5:5, (d)=7:3, (e)=10:0 at 323 K.

A.

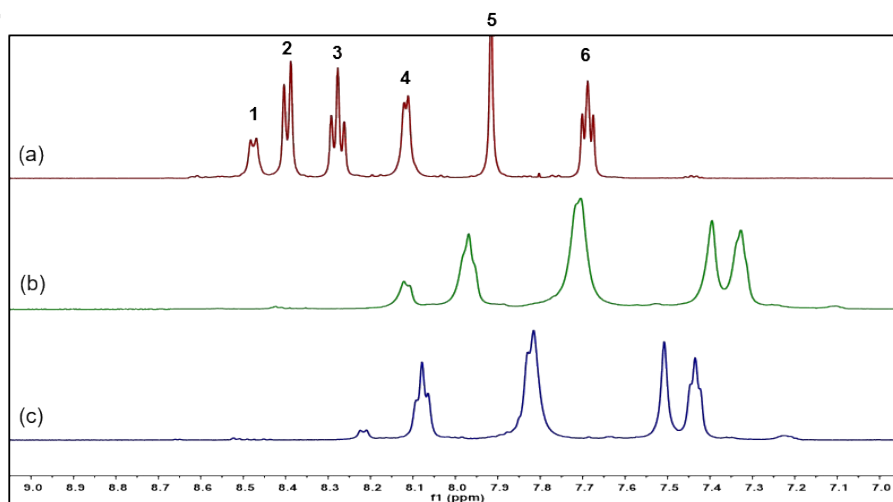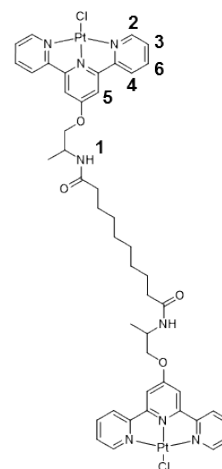

B.

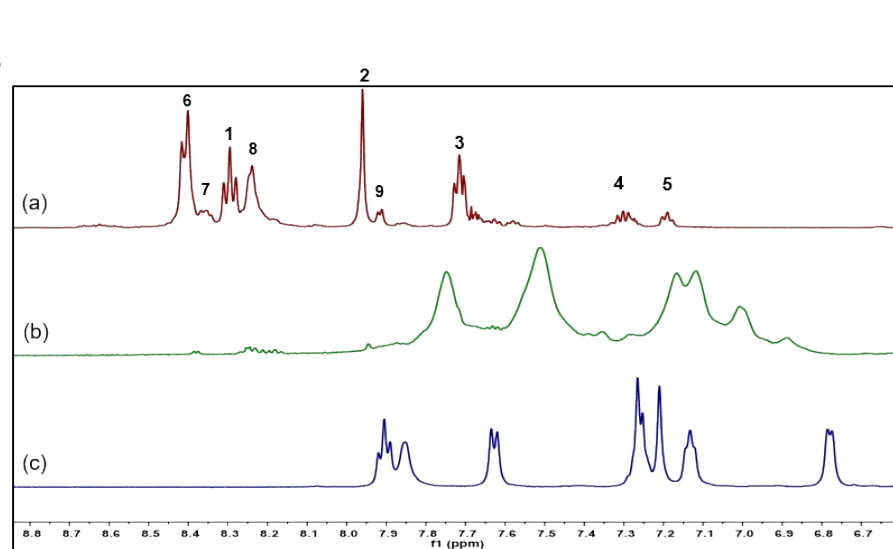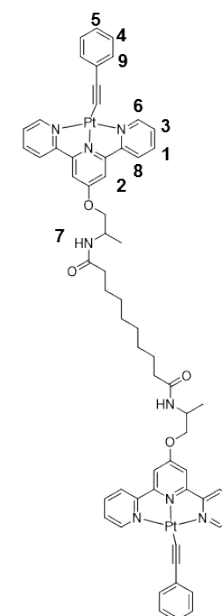

**Fig. S5** Temperature-dependent <sup>1</sup>H NMR spectra of **Ch-1** (9 mM) and **Ph-1** (9 mM) in (a) DMSO-d<sub>6</sub> at 298K and (b and c) DMSO-d<sub>6</sub>/D<sub>2</sub>O (5:5 v/v) at (b) 298 K and (c) 323K.

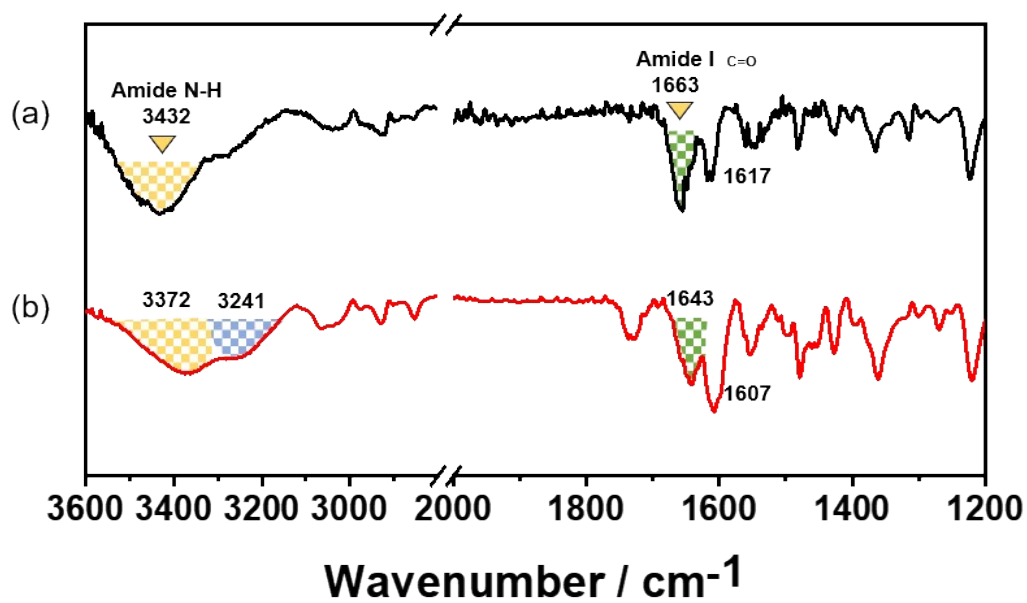

**Fig. S6** FT-IR spectra of **Ch-1** (9 mM) in (a) DMSO and (b) DMSO and H<sub>2</sub>O (1:9 v/v).

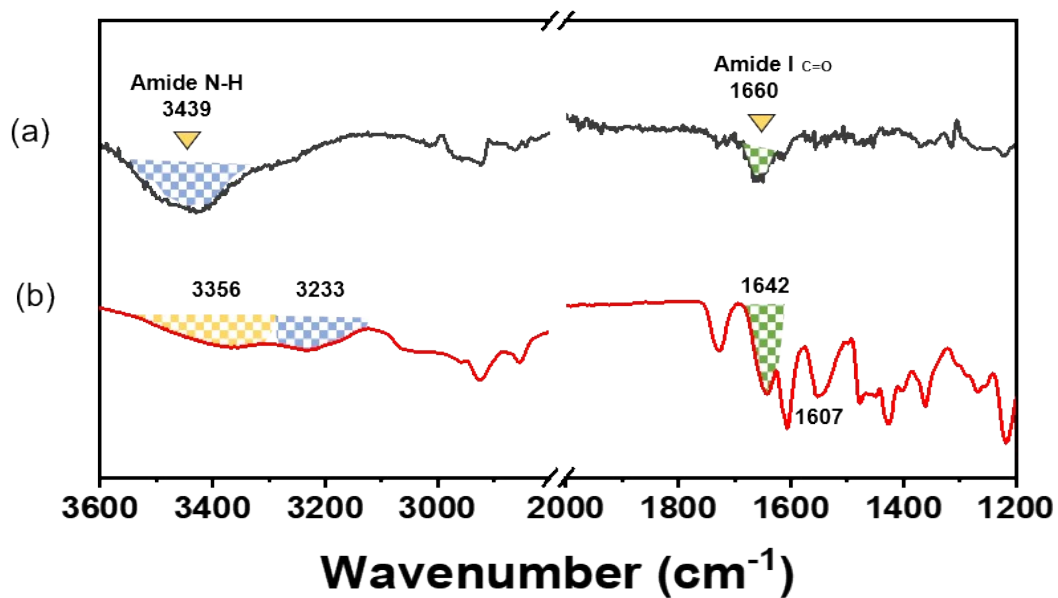

**Fig. S7** FT-IR spectra of **Ph-1** (9 mM) in (a) DMSO and (b) DMSO and H<sub>2</sub>O (1:9 v/v).

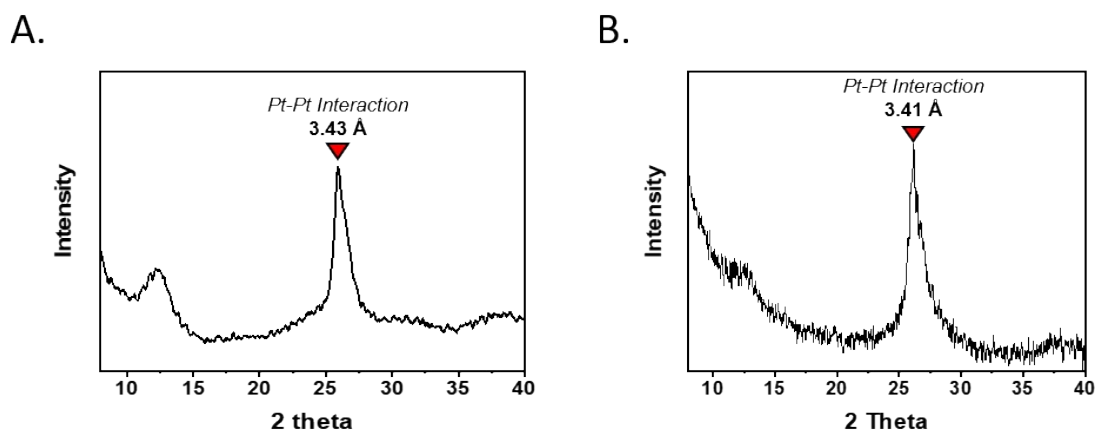

**Fig. S8** WAXD patterns of (A) **Ch-1** (9 mM) and (B) **Ph-1** (9 mM) obtained in DMSO/H<sub>2</sub>O (1:9 v/v).

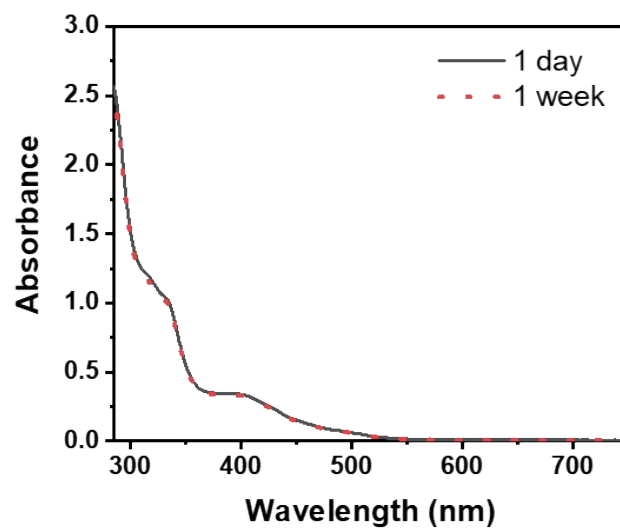

**Fig. S9** UV-vis spectra of **Ch-1** after aging time for 1 day and 1 week.

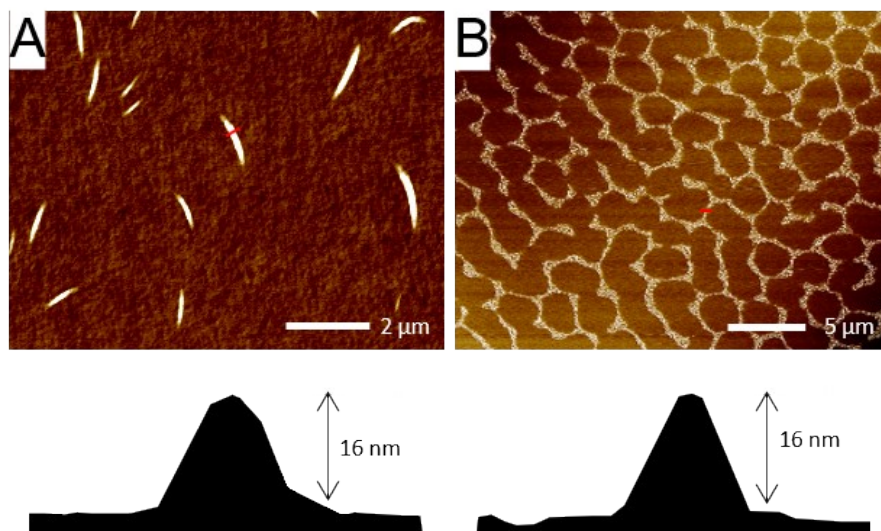

**Fig. S10** AFM images and height profiles of **Ch-1** after aging time for (A) 1 day and (B) 5 days.

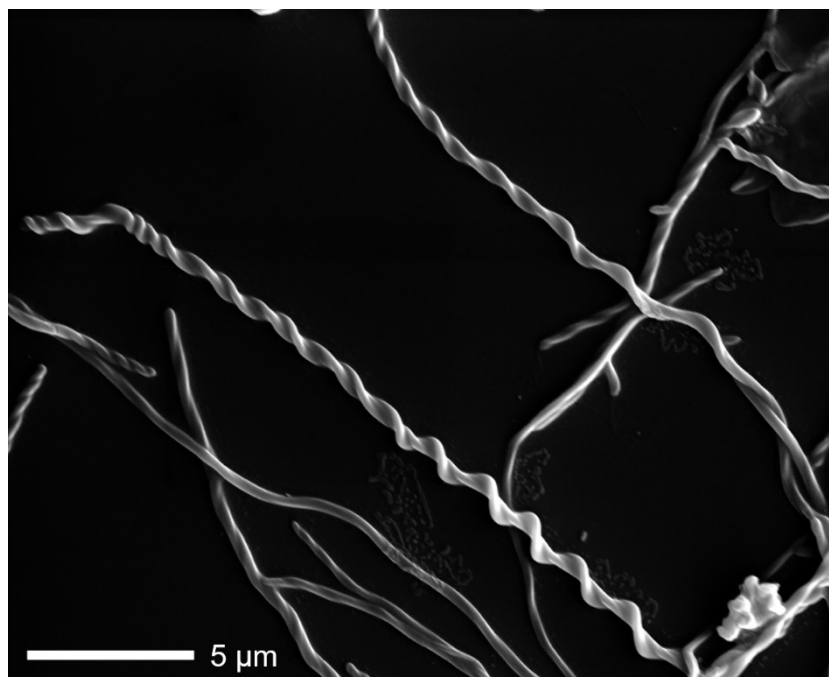

**Fig. S11** SEM image of **Ph-1** (9 mM) obtained from DMSO and H<sub>2</sub>O (1:9 v/v).

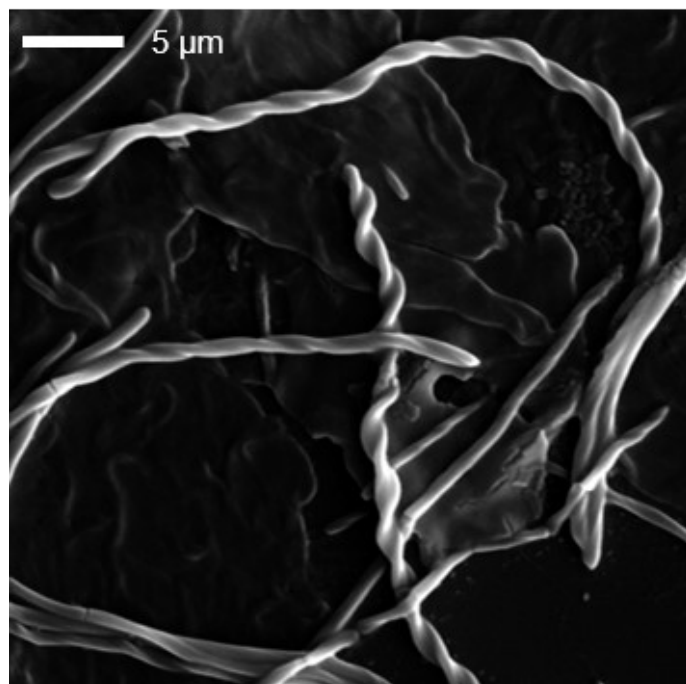

**Fig. S12** SEM image of **Ph-1** (9 mM) after aging time for 1 week.

A.

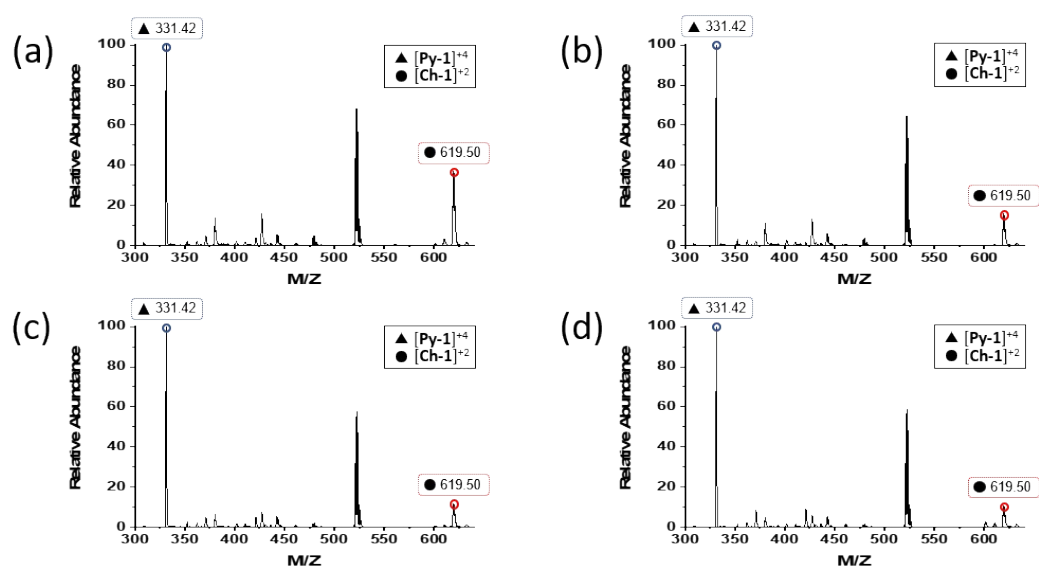

B.

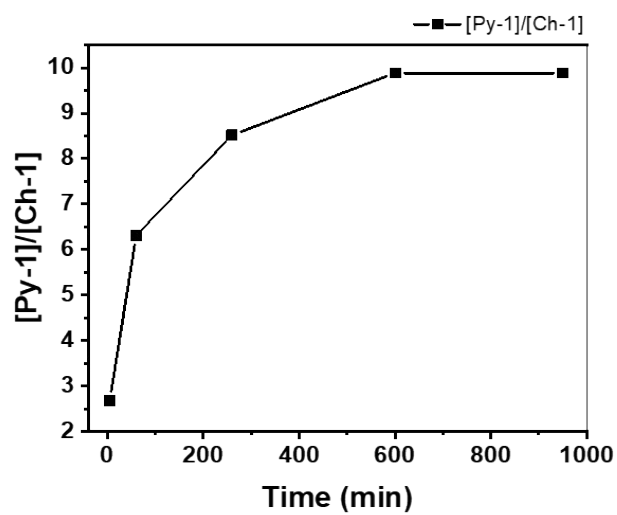

**Fig. S13** ESI-MS spectra of **Ch-1** (9 mM) (A) upon addition of pyridine 140 equiv. (a) 5 min, (b) 1 hours, (c) 4 hours, (d) 10 hours. (B) Plot for time vs intensity of **Py-1/Ch-1**.



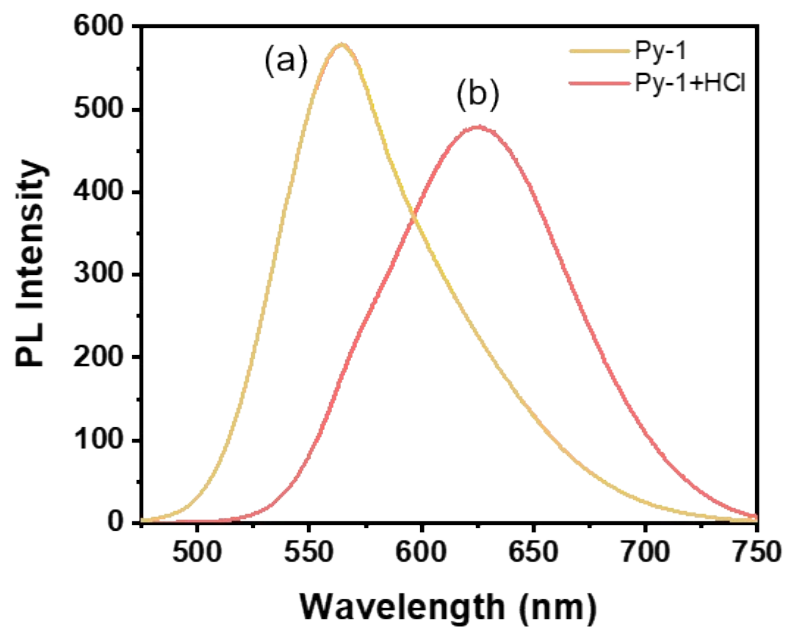

**Fig. S14** PL spectra of (a) **Py-1** (9 mM) upon addition of (b) HCl (140 equiv.) in DMSO and H<sub>2</sub>O (1:9 v/v).

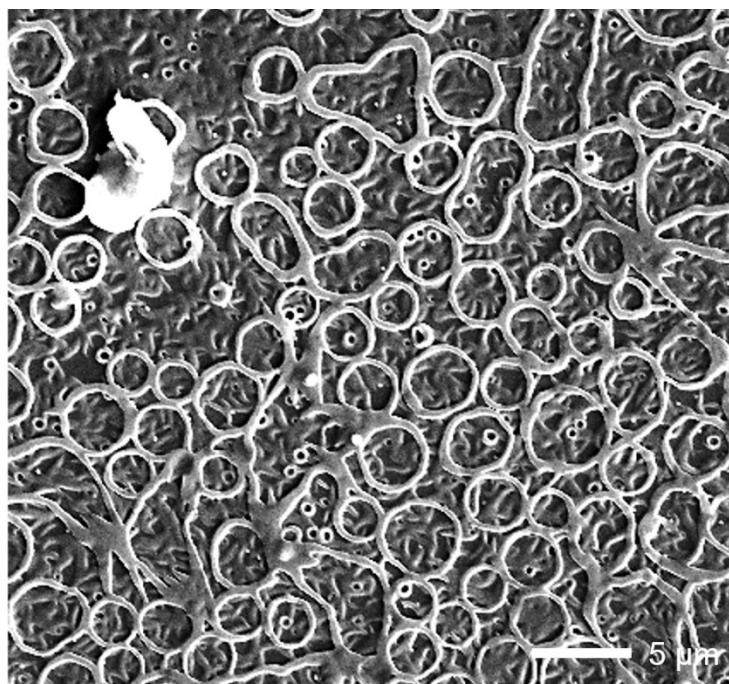

**Fig. S15** SEM image of Py-1 upon addition of HCl (140 equiv.) in DMSO and H<sub>2</sub>O (1:9 v/v).

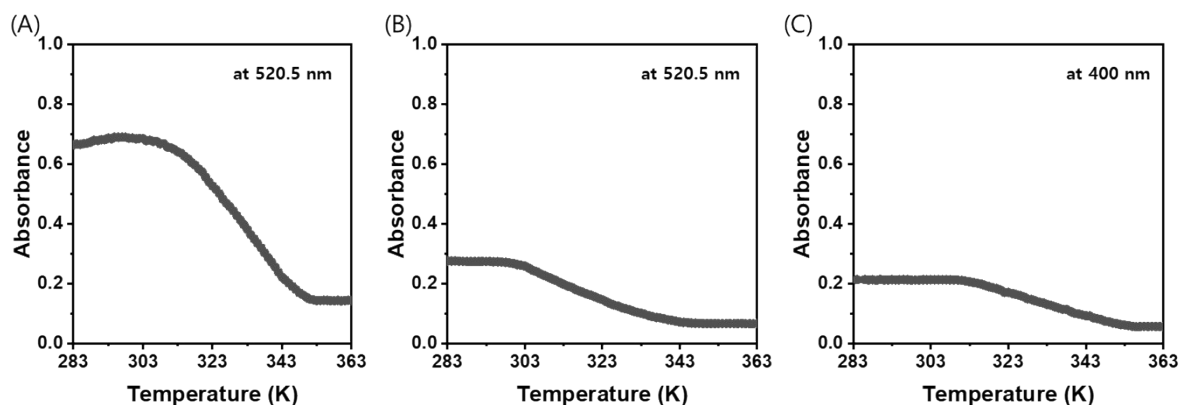

**Fig. S16** Plot of absorbance of (A) **Ch-1**, (B) **Ph-1**, and (C) **Py-1** in DMSO/H<sub>2</sub>O (1:9 v/v) as function of temperature observed during heating processes from 363 to 283 K (at rate of 1K min<sup>-1</sup>)

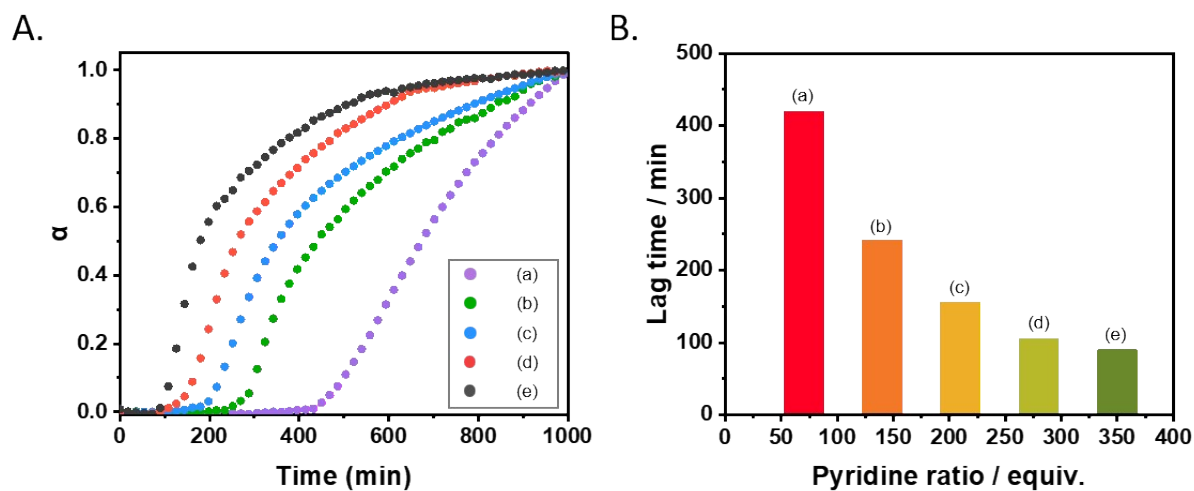

**Fig. S17** (A) Plot for  $\alpha_{agg}$  of **Ch-1** (9 mM) at different concentrations of pyridine vs. time in DMSO and H<sub>2</sub>O (1:9 v/v). (B) Plot for concentration of pyridine vs. lag time. (a) 70 equiv., (b) 140 equiv., (c) 210 equiv., (d) 280 equiv., (e) 350 equiv.

**Table S1.** Luminescence lifetimes of **Ch-1** (9 mM) and **Ph-1** (9 mM) in DMSO and H<sub>2</sub>O (1:9 v/v) or DMSO.

|             | <b>Solvent<br/>(DMSO:H<sub>2</sub>O v/v)</b> | <b>Aveg.<br/>Lifetime (nS)</b> |
|-------------|----------------------------------------------|--------------------------------|
| <b>Ch-1</b> | <b>DMSO</b>                                  | <b>18.7</b>                    |
| <b>Ph-1</b> | <b>DMSO</b>                                  | <b>25.3</b>                    |
| <b>Ch-1</b> | <b>DMSO:H<sub>2</sub>O (1:9 v/v)</b>         | <b>36.3</b>                    |
| <b>Ph-1</b> | <b>DMSO:H<sub>2</sub>O (1:9 v/v)</b>         | <b>56.4</b>                    |
| <b>Py-1</b> | <b>DMSO:H<sub>2</sub>O (1:9 v/v)</b>         | <b>60.8</b>                    |

**Table S2.** Thermodynamic parameters of **Ch-1**, **Ph-1** and **Py-1** obtained in DMSO and H<sub>2</sub>O (1:9 v/v).

|             | $\Delta H_c$ (kJ mol <sup>-1</sup> ) | $\Delta S$ (J K <sup>-1</sup> mol <sup>-1</sup> ) | $T_c$ (K)     | $\Delta G$ (kJ mol <sup>-1</sup> ) | $K_c$ (L mol <sup>-1</sup> ) |
|-------------|--------------------------------------|---------------------------------------------------|---------------|------------------------------------|------------------------------|
| <b>Ch-1</b> | <b>-120.0</b>                        | <b>-323.62</b>                                    | <b>330.78</b> | <b>-25.18</b>                      | <b>3 x 10<sup>4</sup></b>    |
| <b>Ph-1</b> | <b>-110.46</b>                       | <b>-312.95</b>                                    | <b>313.71</b> | <b>-18.77</b>                      | <b>2.2 x 10<sup>3</sup></b>  |
| <b>Py-1</b> | <b>-126.14</b>                       | <b>-342.17</b>                                    | <b>328.03</b> | <b>-25.88</b>                      | <b>4.1 x 10<sup>4</sup></b>  |

## 4. Analytical data

### 4.1 $^1\text{H}$ -NMR and $^{13}\text{C}$ -NMR spectroscopy

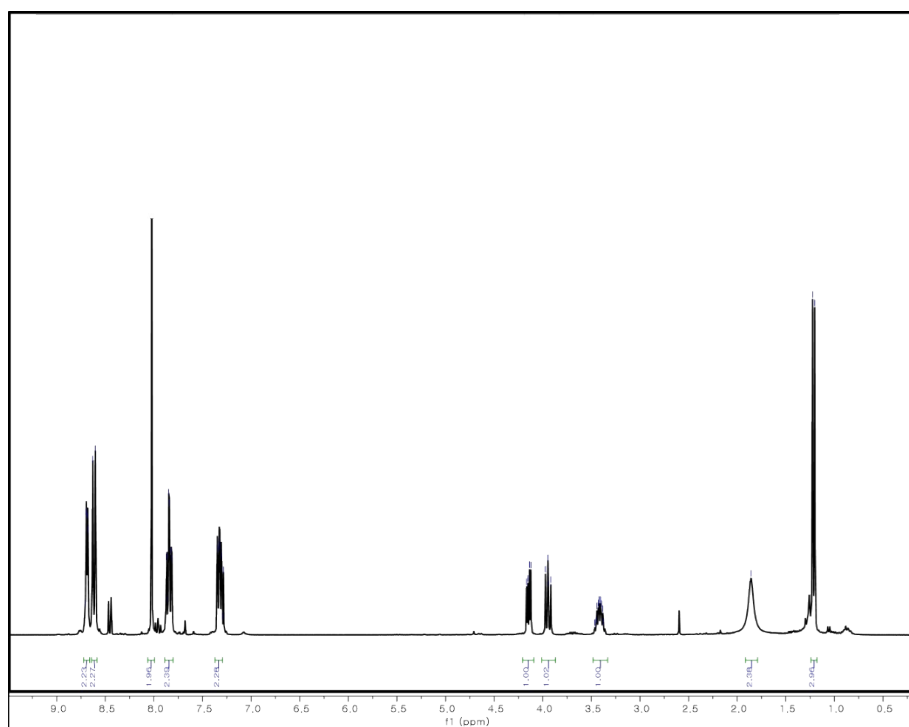

Fig. S18  $^1\text{H}$  NMR spectrum (300 MHz) of  $R\text{-L}^2$  in  $\text{CDCl}_3$  at 298 K.

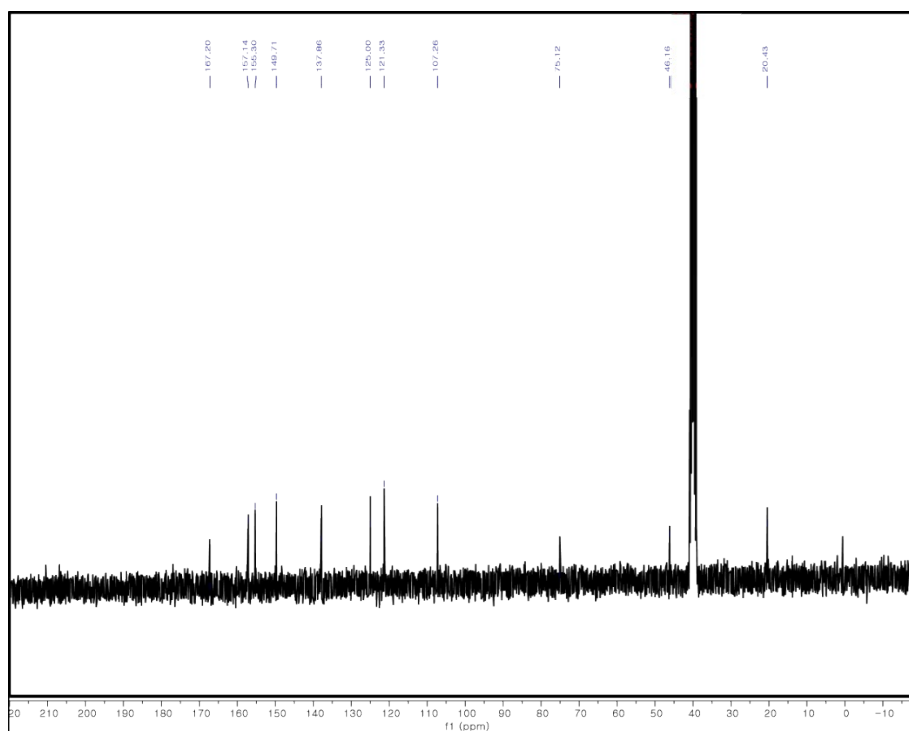

Fig. S19  $^{13}\text{C}$  NMR spectrum (75 MHz) of  $R\text{-L}^2$  in  $\text{DMSO-}d_6$  at 298 K.

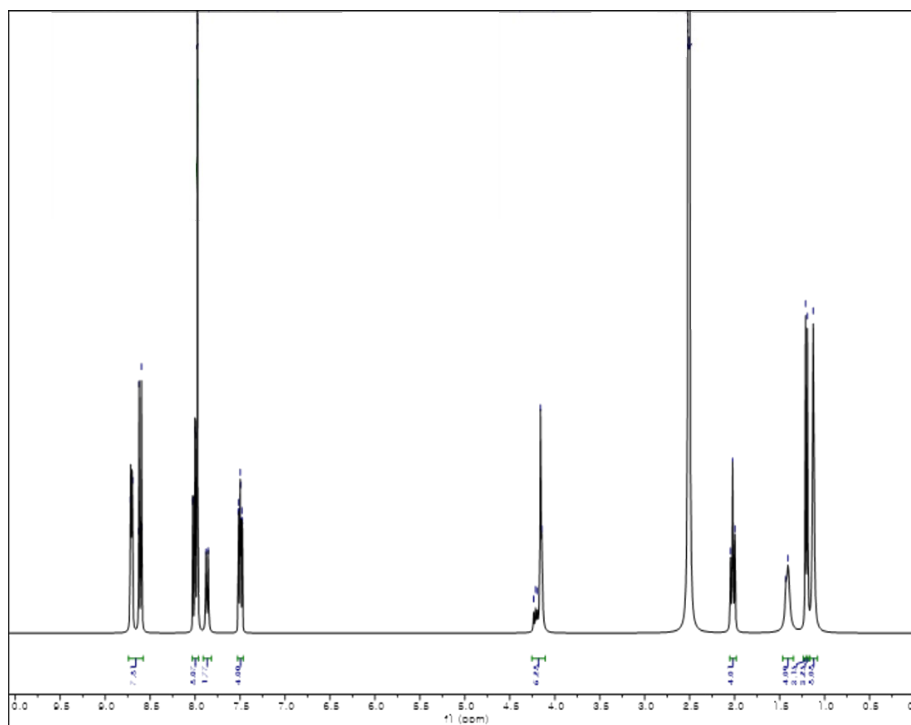

**Fig. S20**  $^1\text{H}$  NMR spectrum (300 MHz) of  $R\text{-L}^1$  in  $\text{DMSO-}d_6$  at 298 K

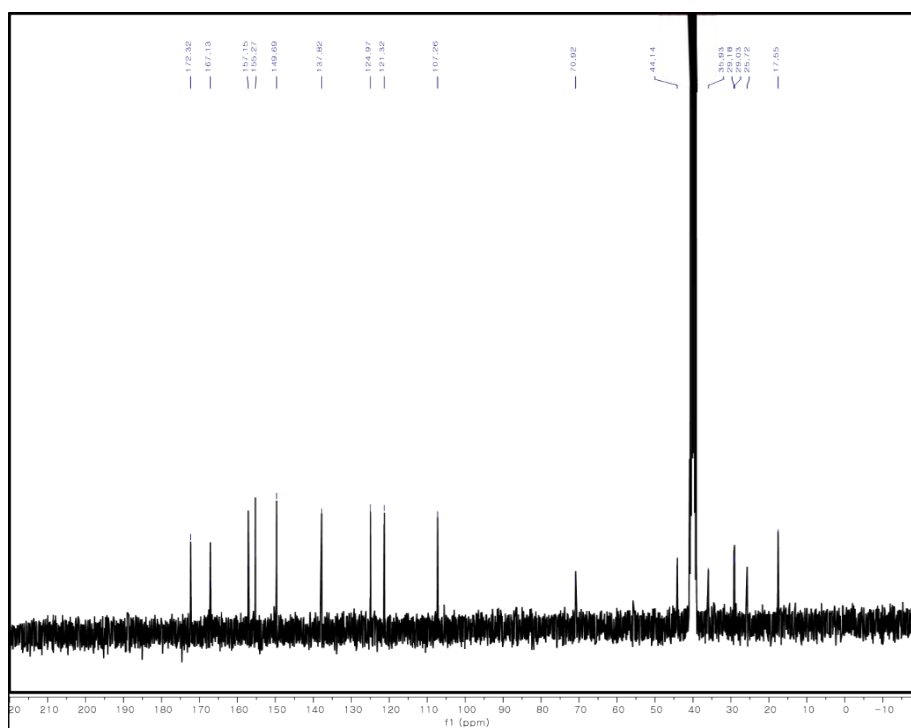

**Fig. S21**  $^{13}\text{C}$  NMR spectrum (75 MHz) of  $R\text{-L}^1$  in  $\text{DMSO-}d_6$  at 298 K.

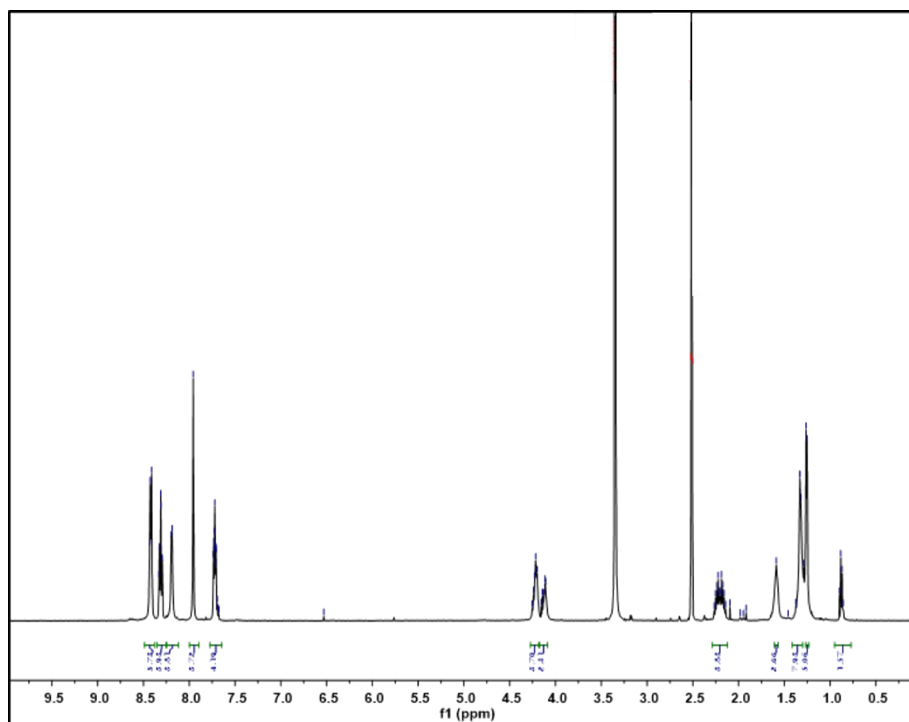

**Fig. S22**  $^1\text{H}$  NMR spectrum (300 MHz) of **Ch-1** in  $\text{DMSO-}d_6$  at 298 K.

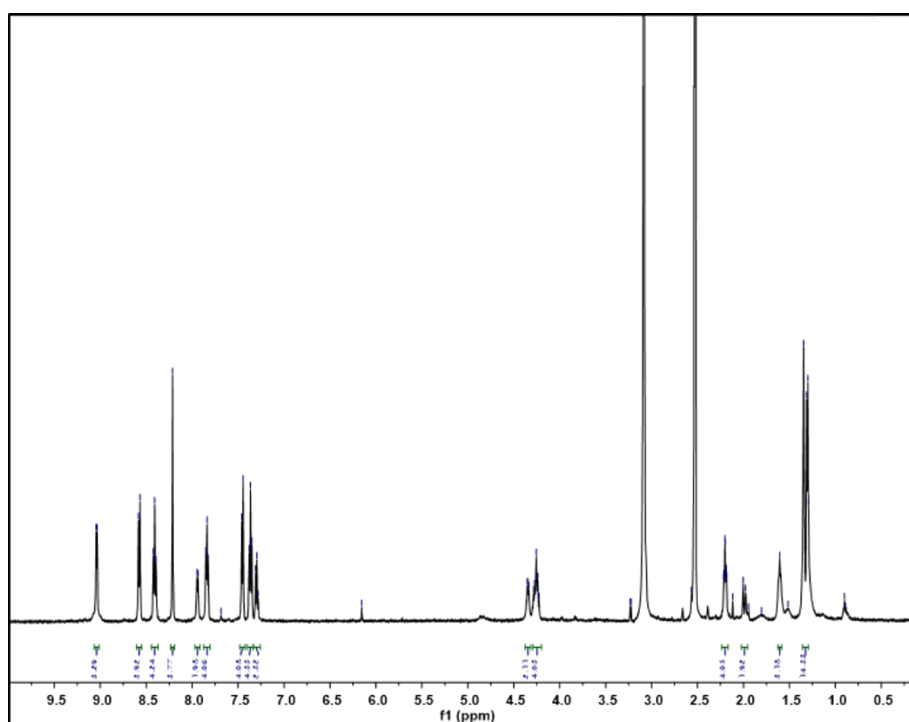

**Fig. S23**  $^1\text{H}$  NMR spectrum (500 MHz) of **Ph-1** in  $\text{DMSO-}d_6$  at 353 K.

## 4.2 HR and ESI mass spectrometry

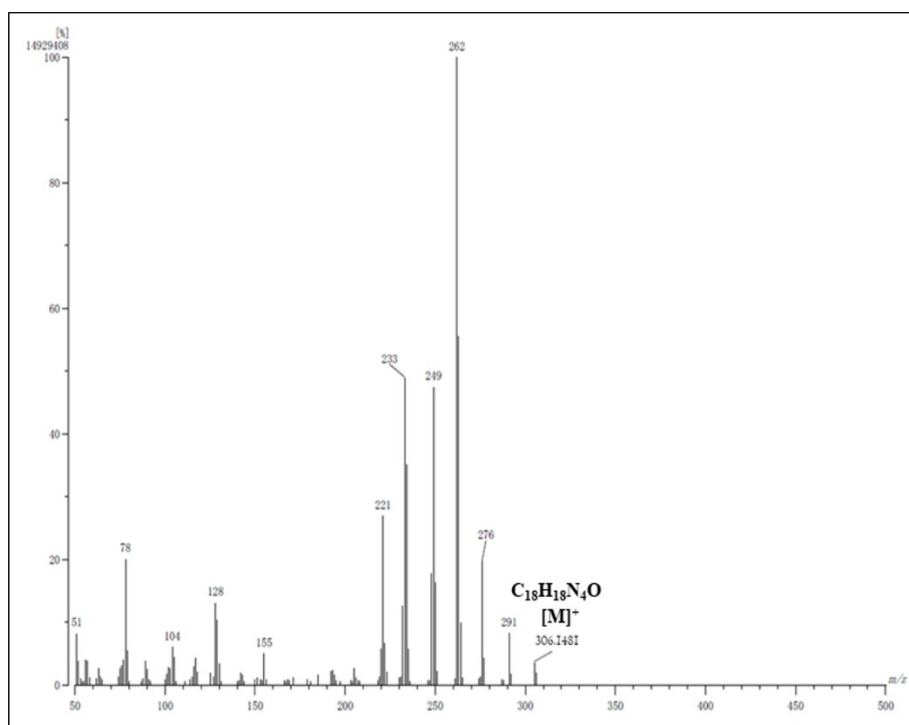

Fig. S24 HR EI-MS spectrum of  $R-L^2$  in DCM.

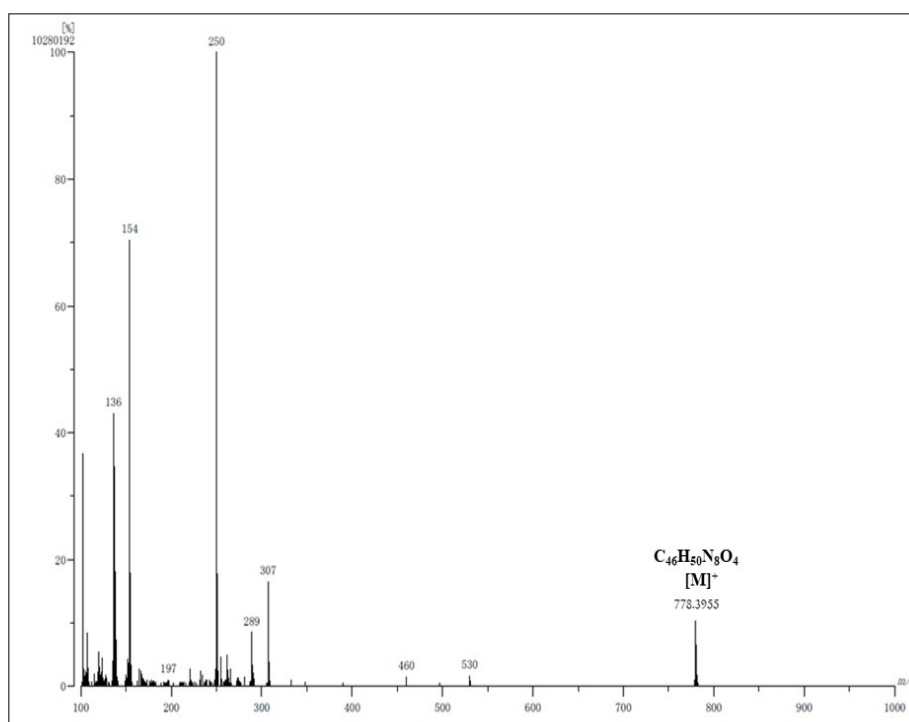

Fig. S25 HR FAB-MS spectrum of  $R-L^1$  in DCM.



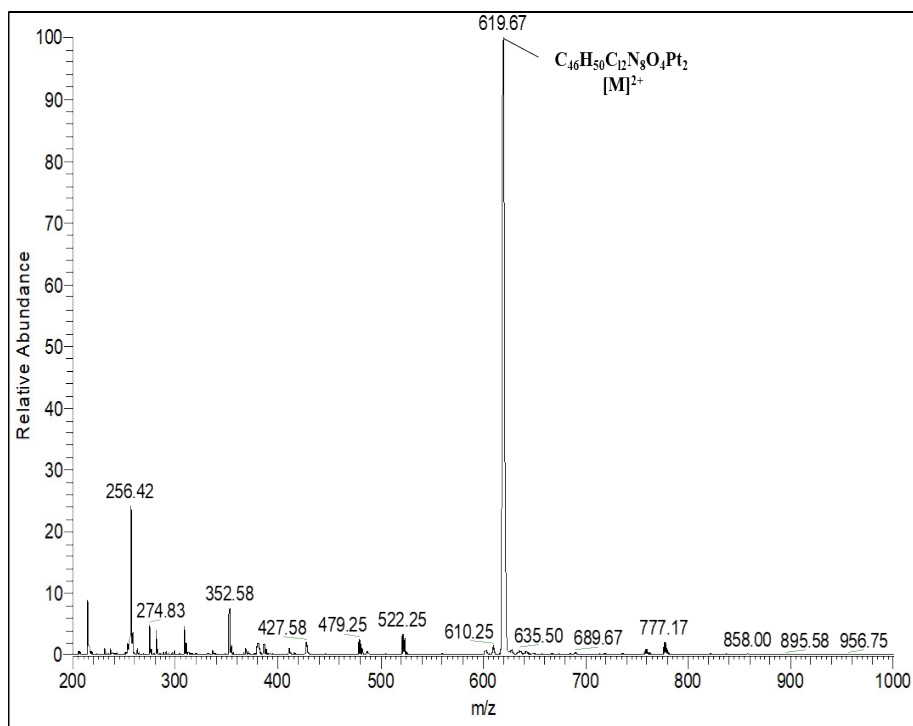

**Fig.S26** ESI Mass spectrum of **Ch-1** in H<sub>2</sub>O.

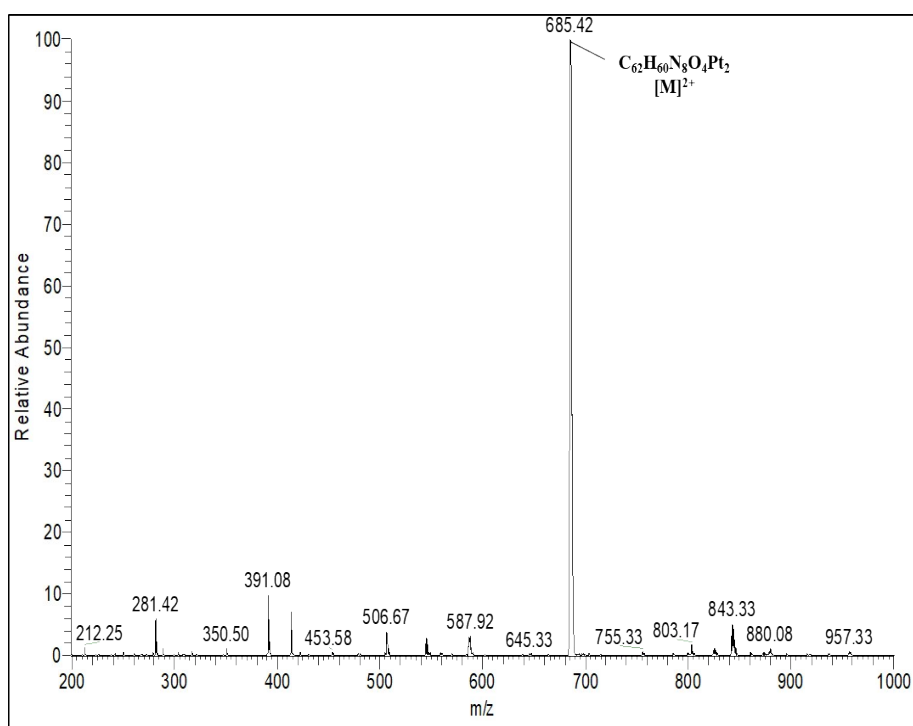

**Fig.S27** ESI Mass spectrum of **Ph-1** in MeOH.

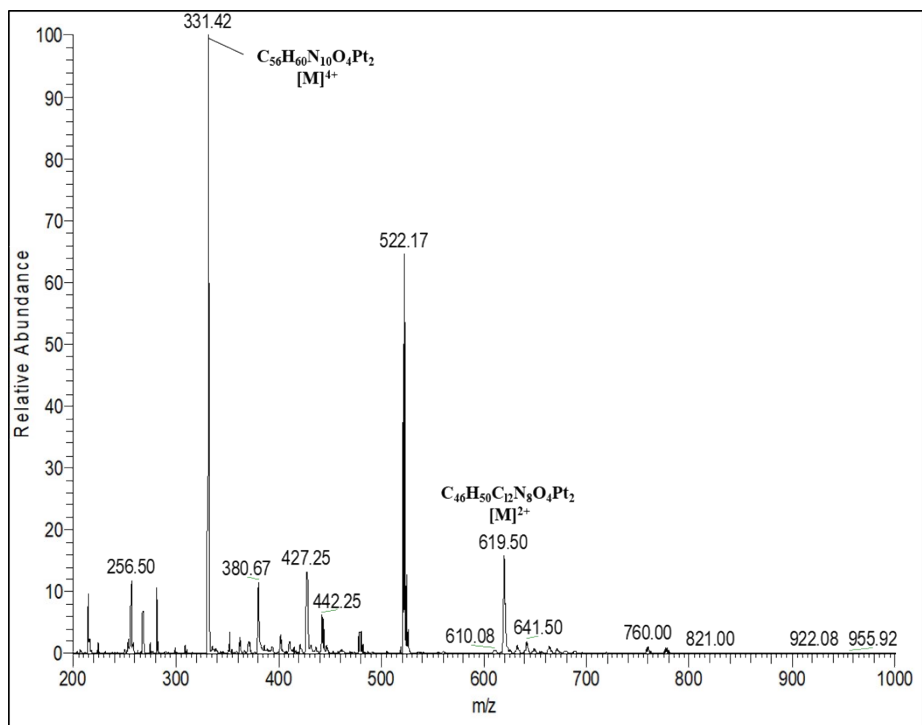

**Fig.S28** ESI Mass spectrum of **Py-1** in H<sub>2</sub>O.

## Notes and references

1. H. M. M. ten Eikelder, A. J. Markvoort, T. F. A. de Greef and P. A. J. Hilbers, *J. Phys. Chem. B*, 2012, **116**, 5291-5301.
2. M. M. J. Smulders, M. M. L. Nieuwenhuizen, T. F. A. de Greef, P. van der Schoot, Schenning, A. P. H. J. Meijer, E. W., How to distinguish isodesmic from cooperative supramolecular polymerisation. *Chem. Eur. J.* **2010**, *16* (1), 362-367.
3. H. Choi, S. Ogi, N. Ando, S. Yamaguchi, Dual trapping of a metastable planarized triarylborane  $\pi$ -system based on folding and lewis acid–base complexation for seeded polymerization. *J. Am. Chem. Soc.* **2021**, *143* (7), 2953-2961.
4. M. H.-Y. Chan, M. Ng, S. Y.-L. Leung, W. H. Lam, Yam, V. W.-W., Synthesis of luminescent platinum(II) 2,6-bis(N-dodecylbenzimidazol-2'-yl)pyridine foldamers and their supramolecular assembly and metallogel formation. *J. Am. Chem. Soc.* **2017**, *139* (25), 8639-8645.
